# Supplementary material for: The multiple uses of telemedicine during the pandemic: the evidence from a cross-sectional survey of medical doctors in Brazil
Source: Research Square preprint supplement (doi:10.21203/rs.3.rs-1886663/v1), 2022-08-01
Supplement: Supplementary file 1 [file d72c9a5e2ae1e313c6e0fe80.dotx]

# Statistical annex

**Table A1: Number of hours dedicated per week to telemedicine, according to physicians' characteristics**

| Physicians' characteristics | Average | Std deviation | Median | Percentile 25 | Percentile 75 | p-value |
| --- | --- | --- | --- | --- | --- | --- |
| Sex |  |  |  |  |  |  |
| Male | 6 | 9 | 4 | 2 | 6 | 0.091 |
| Female | 7 | 10 | 4 | 2 | 8 |
| Age |  |  |  |  |  |  |
| < 35 | 7 | 10 | 4 | 2 | 8 | 0.059 |
| 35–50 | 6 | 9 | 4 | 2 | 6 |
| > 50 | 7 | 9 | 4 | 2 | 10 |
| Professional working area |  |  |  |  |  |  |
| Private | 8 | 8 | 5 | 3 | 10 | 0.031 |
| Public | 7 | 7 | 4 | 2 | 8 |
| Dual-practice | 7 | 10 | 4 | 2 | 6 |
| State |  |  |  |  |  |  |
| Maranhão | 7 | 10 | 4 | 2 | 8 | 0.997 |
| São Paulo | 7 | 9 | 4 | 2 | 8 |
| Region |  |  |  |  |  |  |
| Countryside | 6 | 10 | 4 | 2 | 6 | 0.076 |
| Capital | 7 | 9 | 4 | 2 | 8 |

**Table A2: Use of telemedicine for specific functions and services**

| Purpose of the use of telemedicine | Not performed work with COVID-19 | | | | Worked related to COVID-19 | | | |  |
| --- | --- | --- | --- | --- | --- | --- | --- | --- | --- |
|  | n | % | CI inf | CI sup | n | % | CI inf | CI sup | p-value |
| Office visits and guidance |  |  |  |  |  |  |  |  |  |
| Yes | 168 | 38.80 | 34.30 | 43.50 | 194 | 25.90 | 22.80 | 29.10 | < 0,001 |
| No | 265 | 61.20 | 56.50 | 65.70 | 556 | 74.10 | 70.90 | 77.20 |
| Healthcare team meetings |  |  |  |  |  |  |  |  |  |
| Yes | 207 | 47.80 | 43.10 | 52.50 | 362 | 48.30 | 44.70 | 51.80 | 0,904 |
| No | 226 | 52.20 | 47.50 | 56.90 | 388 | 51.70 | 48.20 | 55.30 |
| Case discussions |  |  |  |  |  |  |  |  |  |
| Yes | 234 | 54.00 | 49.30 | 58.70 | 416 | 55.50 | 51.90 | 59.00 | 0,671 |
| No | 199 | 46.00 | 41.30 | 50.70 | 334 | 44.50 | 41.00 | 48.10 |
| Prescriptions, certificates and medical reports |  |  |  |  |  |  |  |  |  |
| Yes | 129 | 29.80 | 25.60 | 34.20 | 163 | 21.70 | 18.90 | 24.80 | 0,002 |
| No | 304 | 70.20 | 65.80 | 74.40 | 587 | 78.30 | 75.20 | 81.10 |
| Patient electronic record annotations |  |  |  |  |  |  |  |  |  |
| Yes | 127 | 29.30 | 25.20 | 33.70 | 145 | 19.30 | 16.60 | 22.30 | < 0,001 |
| No | 306 | 70.70 | 66.30 | 74.80 | 605 | 80.70 | 77.70 | 83.40 |
| Training, updating, continuing education |  |  |  |  |  |  |  |  |  |
| Yes | 176 | 40.60 | 36.10 | 45.30 | 294 | 39.20 | 35.80 | 42.70 | 0.666 |
| No | 257 | 59.40 | 54.70 | 63.90 | 456 | 60.80 | 57.30 | 64.20 |
